# Supplementary material for: Transgenic RXLR Effector PITG_15718.2 Suppresses Immunity and Reduces Vegetative Growth in Potato
Source: Int J Mol Sci. 2019 Jun 21;20(12):3031. doi: 10.3390/ijms20123031 (PMC6627464; doi:10.3390/ijms20123031)
Supplement: Supplementary file 1 [file ijms-20-03031-s001.pdf]

## Supporting informations

**Table S1.** Statistics of preprocessing data.

| Sample | RawData(G) | CleanData(G) | Effective(%) | Q20(%) | Q30(%) | Error rate(%) | GC Content |
|--------|------------|--------------|--------------|--------|--------|---------------|------------|
| CK15-1 | 7.61       | 7.31         | 96.15        | 97.47  | 93.63  | 0.01          | 42.97      |
| CK7-1  | 9.9        | 9.1          | 95.99        | 97.44  | 93.57  | 0.01          | 43.14      |
| CK9-1  | 8.15       | 7.79         | 95.55        | 97.37  | 93.42  | 0.01          | 42.7       |
| 15-1   | 8.51       | 8.15         | 95.78        | 97.4   | 93.49  | 0.01          | 43.17      |
| 7-1    | 7.67       | 7.3          | 95.17        | 97.28  | 93.25  | 0.01          | 42.8       |
| 9-1    | 8.14       | 7.77         | 95.47        | 97.38  | 93.47  | 0.01          | 42.64      |

(1). Sample: Sample name;

(2). RawData (G): The original data, in units of G;

(3). CleanData (G): The amount of valid data obtained by filtering, in units of G;

(4). Effective (%): representing the percentage of CleanData to RawData;

(5). Q20 and Q30 (%): The percentage of bases with Phred values greater than 20 and 30 was calculated respectively;

(6). Error rate (%): sample error rate;

(7). GC Content: Calculate the total number of bases G and C and the percentage of the total number of bases.

**Table S2.** The statistics of sequencing data is aligned to the reference genome

| Sample | Total reads | Total mapped | Multiple mapped | Uniquely mapped | Non-splice reads | Splice reads |
|--------|-------------|--------------|-----------------|-----------------|------------------|--------------|
| CK15-1 | 49052440    | 37546312     | 3448723         | 34097589        | 21490194         | 16056118     |
|        |             | (76.5%)      | (7.0%)          | (69.5%)         | (43.8%)          | (32.7%)      |
| CK7-1  | 63850896    | 49402912     | 5538661         | 43864251        | 28753868         | 20649044     |
|        |             | (77.4%)      | (8.7%)          | (68.7%)         | (45.1%)          | (32.3%)      |
| CK9-1  | 52271126    | 39942371     | 3356865         | 36585506        | 22525996         | 17416375     |
|        |             | (76.9%)      | (6.4%)          | (70%)           | (43.1%)          | (33.3%)      |
| 15-1   | 52267810    | 40263471     | 3426392         | 36837079        | 22687995         | 17575476     |
|        |             | (77%)        | (6.5%)          | (70.5%)         | (43.4%)          | (33.6%)      |
| 7-1    | 54765606    | 42534598     | 4335471         | 38199127        | 24219309         | 18315289     |
|        |             | (77.7%)      | (7.9%)          | (69.8%)         | (44.3%)          | (33.4%)      |
| 9-1    | 49119334    | 38182638     | 3768834         | 34413804        | 21728404         | 16454234     |
|        |             | (77.7%)      | (7.6%)          | (70.1%)         | (44.2%)          | (33.5%)      |

(1). Sample: sample name;

(2). Total reads: Valid data obtained by quality control of sequencing data (Clean data);

(3). Total mapped: Quantitative statistics of sequencing sequences that can be mapped to the genome;

(4). Multiple mapped: Quantitative statistics of sequencing sequences with multiple alignment positions on the reference sequence;

(5). Uniquely mapped: the number of sequencing sequences with unique alignment positions on the reference sequence;

(6). Non-splice reads: Complete comparison of sequenced Read statistics with exon regions;

(7). Splice reads: Segmentation alignment to the statistics of sequencing reads on two exons.

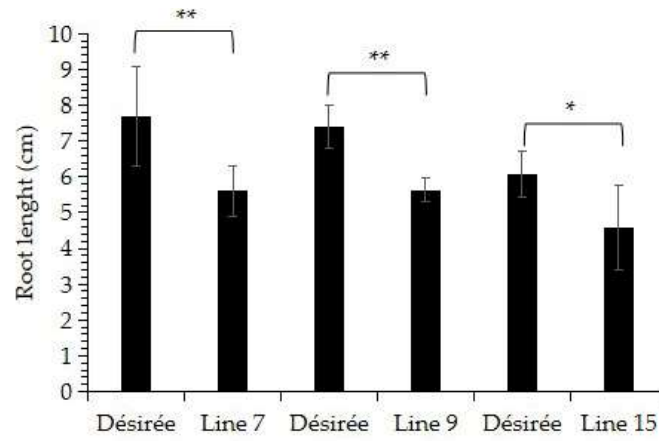

**Figure S1.** The root length was stunted for transgenic lines compared to Désirée. The root length was measured with at least 30 plantlets. “\*\*” and “\*” indicates significant differences determined using Student’s *t*-test ( $P < 0.01$  and  $P < 0.05$ ) respectively.

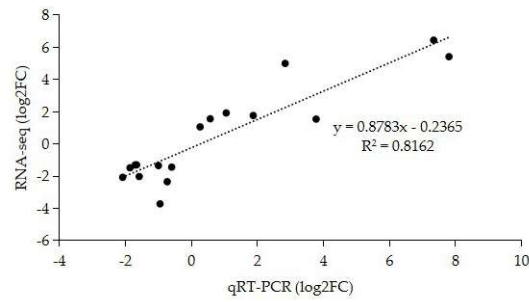

**Figure S2.** Correlation of the data of 17 DEGs between qRT-PCR and RNA-Seq. The pearson correlation coefficient reached 0.9014.
